# Supplementary material for: Ozone and Temperature May Hinder Adaptive Capacity of Mediterranean Perennial Grasses to Future Global Change Scenarios
Source: MDPI journal article supplement (doi:10.3390/plants12030664), 2023-02-02

## Supplementary information

Figure S1. Picture of two OTCs and one AMB plot of the OTC facility.

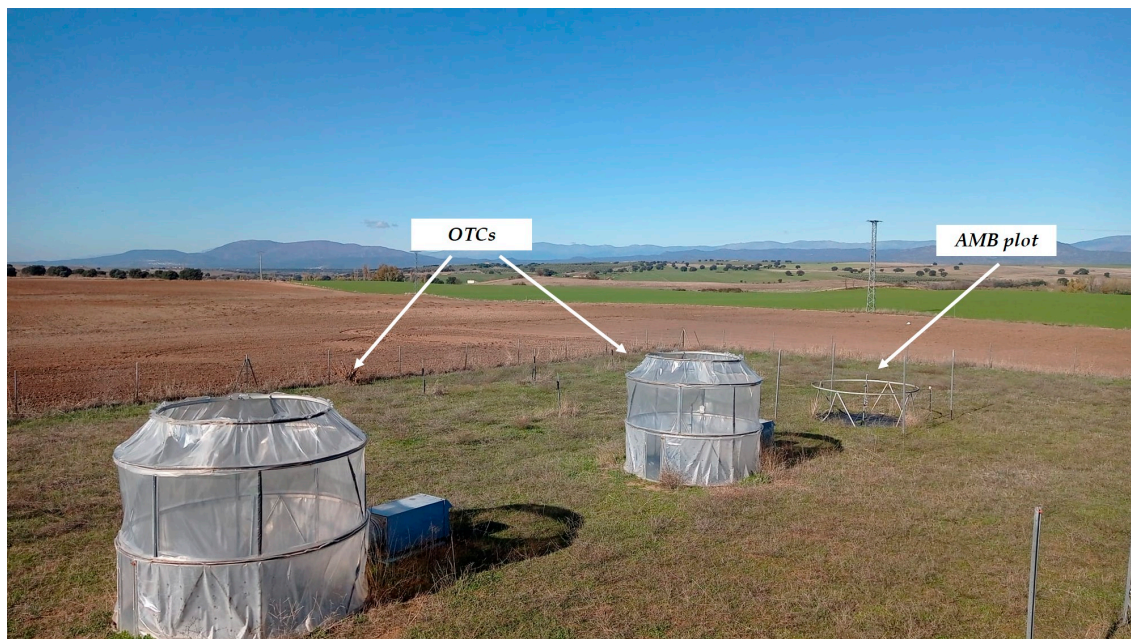

*Description of the description of the total content of C, H, macro- and micro-nutrient determination:*

Samples were analyzed in the CIEMAT lab of the Chemistry Division. The total content of carbon, hydrogen and nitrogen were determined by combustion employing a LECO TruSpec CHN elemental analyzer (LECO INSTRUMENTOS S.L., Madrid, Spain). C, N and H contents were determined by heating to temperature of at least 900°C in the presence of oxygen gas. Mineral and organic compounds were oxidized and/or volatilized to carbon dioxide (CO<sub>2</sub>), water (H<sub>2</sub>O), nitrogen oxides (NO<sub>x</sub>) and molecular nitrogen (N<sub>2</sub>). The amount of carbon dioxide and water was measured by an infrared detection method. In order to quantify macro-nutrients (K, Ca, Mg, P, and S) and micro-nutrients (B, Cu, Fe, Mn, Mo, and Zn), previous treatments of the samples are required for putting quantitatively into solution these elements. Plant samples were digested in a DigiPrep block (SCP Science, Quebec, Canada) equipped with a temperature–time programmable controller by using open polypropylene tubes with reflux caps in a graphite heating block at high temperature. Briefly, 250 mg dry weight plant samples were mixed with 6 ml of nitric acid (HNO<sub>3</sub>) (67-69 %) and 2 ml of hydrofluoric acid (HF) (47-51 %). They were subjected to heat reaching 120°C in 40 min and being held for 60 min, and then cooled, filtered, diluted to the mark (50 ml) with ultrapure water and preserved for subsequent analysis. Concentrations of each macro- and micro-nutrient were determined by inductively coupled plasma optical emission spectrometry (ICP-OES) using a benchtop dual view ICP-OES with a vertical torch, Agilent 5900 SVDV model (Agilent Technologies Spain, S.L., Spain) equipped with an Advanced Valve System (AVS 7) and with the optic system purged with argon. Multielement standard solutions for calibration were daily prepared by successive dilutions of macro- and micro- nutrients at different concentrations. Plant simple digestions

were analyzed directly or diluted when the concentration are higher than those of the most concentrated standard. For these analyses all reagents were purchased from Merck KGaA (Darmstadt, Germany). The reagents were ultrapure analysis quality. Ultrapure water (resistivity  $\geq 18.2 \text{ M}\Omega \text{ cm}$ ) was obtained by a Milli-Q Element A10 (Millipore, Bedford, MA, USA). Stock standard solutions  $1000 \text{ mg l}^{-1}$  of each single element in  $2\% \text{ HNO}_3$  were Spex CertiPrep (Fisher Scientific SL, Madrid, Spain) were used to prepare the corresponding multielement stock standard solutions by successive dilutions. Argon gas of purity higher than 99.999% was used in the ICP-OES instrument (Air Liquide, Spain).

Table S1. Number of samples per treatment and specie for Vegetative growth (dry weight), Gas Exchange (A,  $g_s$  and WUE) and Nutrient (contents and rates) measurements.

| Measurement         | Treatment | <i>A. castellana</i> | <i>S. tenacissima</i> | <i>F. indigesta</i> | <i>F. iberica</i> |
|---------------------|-----------|----------------------|-----------------------|---------------------|-------------------|
| <b>Dry weight</b>   | CFA       | 18                   | 17                    | 6                   | 16                |
|                     | NFA       | 18                   | 18                    | 11                  | 15                |
|                     | NFA+      | 18                   | 17                    | 11                  | 15                |
|                     | NFA++     | 18                   | 18                    | 12                  | 13                |
|                     | AMB       | 18                   | 18                    | 11                  | 18                |
| total per specie    |           | 90                   | 88                    | 51                  | 77                |
| <b>Gas exchange</b> | CFA       | 6                    | 9                     | 4                   | 8                 |
|                     | NFA       | 7                    | 9                     | 6                   | 7                 |
|                     | NFA+      | 7                    | 9                     | 6                   | 8                 |
|                     | NFA++     | 6                    | 9                     | 6                   | 9                 |
|                     | AMB       | 6                    | 9                     | -                   | 4                 |
| total per specie    |           | 32                   | 45                    | 22                  | 36                |
| <b>Nutrients</b>    | CFA       | 6                    | 6                     | 2                   | 5                 |
|                     | NFA       | 5                    | 6                     | 6                   | 4                 |
|                     | NFA+      | 6                    | 5                     | 4                   | 4                 |
|                     | NFA++     | 6                    | 6                     | 6                   | 3                 |
|                     | AMB       | 6                    | 6                     | 5                   | 6                 |
| total per specie    |           | 29                   | 29                    | 23                  | 22                |

Table S2. LICOR measurements conditions for photosynthesis and conductance. Days of  $\text{O}_3$  exposition (Days), temperature ( $T^a$ ), relative humidity (RH) and photosynthetic active radiation (PAR).

|                       | Days | RH (%) | $T^a$ ( $^{\circ}\text{C}$ ) | PAR $\mu\text{mol (m}^{-2} \text{s}^{-1})$ |
|-----------------------|------|--------|------------------------------|--------------------------------------------|
| <i>S. tenacissima</i> | 35   | 49     | 20                           | 1000                                       |
| <i>A. castellana</i>  | 33   | 48     | 20                           | 1000                                       |
| <i>F. iberica</i>     | 34   | 36     | 22                           | 1000                                       |
| <i>F. indigesta</i>   | 28   | 42     | 25                           | 1000                                       |

Table S3. A priori contrast results of the lineal effect, quadratic effect and cubic effect for each specie in vegetative growth, A, g<sub>s</sub> and WUE.

| trait             | specie                | a priori contrast | Df | Std. error | t     | P    |
|-------------------|-----------------------|-------------------|----|------------|-------|------|
| vegetative growth | <i>A. castellana</i>  | intercept         | 66 | 0.43       | 43.34 |      |
|                   |                       | lineal effect     | 66 | 0.86       | 0.21  | 0.83 |
|                   |                       | quadratic effect  | 66 | 0.86       | -1.18 | 0.24 |
|                   |                       | cubic effect      | 66 | 0.86       | 0.39  | 0.69 |
|                   | <i>S. tenacissima</i> | intercept         | 64 | 0.95       | 12.91 | 0    |
|                   |                       | lineal effect     | 64 | 0.6        | 1.12  | 0.27 |
|                   |                       | quadratic effect  | 64 | 0.6        | 1.05  | 0.3  |
|                   |                       | cubic effect      | 64 | 0.6        | 0.95  | 0.35 |
|                   | <i>F. indigesta</i>   | intercept         | 28 | 0.48       | 6.65  | 0    |
|                   |                       | lineal effect     | 6  | 0.99       | -0.21 | 0.84 |
|                   |                       | quadratic effect  | 6  | 0.96       | -0.39 | 0.71 |
|                   |                       | cubic effect      | 6  | 0.94       | 2.22  | 0.07 |
|                   | <i>F. iberica</i>     | intercept         | 46 | 0.83       | 5.42  | 0    |
|                   |                       | lineal effect     | 6  | 1.4        | 0.98  | 0.96 |
|                   |                       | quadratic effect  | 6  | 1.41       | 0.37  | 0.48 |
|                   |                       | cubic effect      | 6  | 1.42       | 0.26  | 0.53 |
| photosynthesis    | <i>A. castellana</i>  | intercept         | 20 | 1.69       | 16.65 | 0    |
|                   |                       | lineal effect     | 20 | 2.36       | 1.93  | 0.07 |
|                   |                       | quadratic effect  | 20 | 2.3        | 0.47  | 0.65 |
|                   |                       | cubic effect      | 20 | 2.21       | 0.03  | 0.97 |
|                   | <i>S. tenacissima</i> | intercept         | 30 | 1          | 32.43 | 0    |
|                   |                       | lineal effect     | 30 | 2          | -0.27 | 0.79 |
|                   |                       | quadratic effect  | 30 | 2          | 1.61  | 0.12 |
|                   |                       | cubic effect      | 30 | 2          | 0.27  | 0.79 |
|                   | <i>F. indigesta</i>   | intercept         | 16 | 4.12       | 6.11  | 0    |
|                   |                       | lineal effect     | 16 | 3.09       | 0.5   | 0.63 |
|                   |                       | quadratic effect  | 16 | 2.96       | 0.38  | 0.71 |
|                   |                       | cubic effect      | 16 | 2.82       | -2.03 | 0.06 |
|                   | <i>F. iberica</i>     | intercept         | 26 | 1.53       | 21.67 | 0    |
|                   |                       | lineal effect     | 26 | 2.98       | -0.07 | 0.94 |
|                   |                       | quadratic effect  | 26 | 3.05       | 0.016 | 0.88 |
|                   |                       | cubic effect      | 26 | 3.13       | -1.29 | 0.21 |

Table S3 (continued). A priori contrast results of the lineal effect, quadratic effect and cubic effect for each specie in vegetative growth, A,  $g_s$  and WUE.

| trait       | specie                | a priori contrast | Df | Std. error | t     | P    |
|-------------|-----------------------|-------------------|----|------------|-------|------|
| conductance | <i>A. castellana</i>  | intercept         | 20 | 0.045      | 10.99 | 0    |
|             |                       | lineal effect     | 20 | 0.049      | 0.94  | 0.36 |
|             |                       | quadratic effect  | 20 | 0.048      | 1.79  | 0.09 |
|             |                       | cubic effect      | 20 | 0.046      | -0.18 | 0.86 |
|             | <i>S. tenacissima</i> | intercept         | 30 | 0.06       | 13.77 | 0    |
|             |                       | lineal effect     | 30 | 0.09       | -0.71 | 0.48 |
|             |                       | quadratic effect  | 30 | 0.09       | 1.42  | 0.17 |
|             |                       | cubic effect      | 30 | 0.09       | 0.72  | 0.18 |
|             | <i>F. indigesta</i>   | intercept         | 16 | 0.06       | 6.14  | 0    |
|             |                       | lineal effect     | 16 | 0.06       | 0.69  | 0.5  |
|             |                       | quadratic effect  | 16 | 0.06       | 1.52  | 0.15 |
|             |                       | cubic effect      | 16 | 0.06       | -1.14 | 0.27 |
|             | <i>F. iberica</i>     | intercept         | 26 | 0.06       | 13.94 | 0    |
|             |                       | lineal effect     | 26 | 0.12       | -1.21 | 0.24 |
|             |                       | quadratic effect  | 26 | 0.12       | -0.05 | 0.96 |
|             |                       | cubic effect      | 26 | 0.12       | -1.75 | 0.09 |
| WUE         | <i>A. castellana</i>  | intercept         | 20 | 2.13       | 27.4  | 0    |
|             |                       | lineal effect     | 20 | 3.33       | 1.09  | 0.29 |
|             |                       | quadratic effect  | 20 | 3.25       | -2.22 | 0.04 |
|             |                       | cubic effect      | 20 | 3.13       | 0.22  | 0.82 |
|             | <i>S. tenacissima</i> | intercept         | 30 | 0.06       | 61.98 | 0    |
|             |                       | lineal effect     | 30 | 0.08       | 0.47  | 0.64 |
|             |                       | quadratic effect  | 30 | 0.08       | -0.67 | 0.51 |
|             |                       | cubic effect      | 30 | 0.08       | -0.97 | 0.34 |
|             | <i>F. indigesta</i>   | intercept         | 16 | 2.71       | 26.37 | 0    |
|             |                       | lineal effect     | 16 | 5.66       | -0.64 | 0.53 |
|             |                       | quadratic effect  | 16 | 5.42       | -2.37 | 0.03 |
|             |                       | cubic effect      | 16 | 5.18       | -0.28 | 0.79 |
|             | <i>F. iberica</i>     | intercept         | 26 | 2          | 21.71 | 0    |
|             |                       | lineal effect     | 26 | 3.9        | 2.26  | 0.03 |
|             |                       | quadratic effect  | 26 | 4          | 0.58  | 0.57 |
|             |                       | cubic effect      | 26 | 4.1        | 2.08  | 0.05 |

Table S4. Temperature effect results on vegetative growth, A, g<sub>s</sub> and WUE.

| trait             | specie                |           | num Df | den Df | F      | P       |
|-------------------|-----------------------|-----------|--------|--------|--------|---------|
| vegetative growth | <i>A. castellana</i>  | intercept | 1      | 32     | 737.53 | <0.0001 |
|                   |                       | ozone     | 1      | 32     | 3.95   | 0.055   |
|                   | <i>S. tenacissima</i> | intercept | 1      | 32     | 493.72 | <0.0001 |
|                   |                       | ozone     | 1      | 32     | 0.1    | 0.76    |
|                   | <i>F. indigesta</i>   | intercept | 1      | 16     | 26.99  | 0.0001  |
|                   |                       | ozone     | 1      | 2      | 0.11   | 0.77    |
|                   | <i>F. iberica</i>     | intercept | 1      | 26     | 33.48  | <0.0001 |
|                   |                       | ozone     | 1      | 2      | 0.01   | 0.94    |
| photosynthesis    | <i>A. castellana</i>  | intercept | 1      | 9      | 60.18  | 0       |
|                   |                       | ozone     | 1      | 9      | 0.53   | 0.48    |
|                   | <i>S. tenacissima</i> | intercept | 1      | 14     | 1384.7 | <0.0001 |
|                   |                       | ozone     | 1      | 14     | 7.24   | 0.02    |
|                   | <i>F. iberica</i>     | intercept | 1      | 7      | 57.26  | 0.0001  |
|                   |                       | ozone     | 1      | 7      | 1.73   | 0.23    |
| conductance       | <i>A. castellana</i>  | intercept | 1      | 9      | 44.58  | 0.0001  |
|                   |                       | ozone     | 1      | 9      | 3.59   | 0.09    |
|                   | <i>S. tenacissima</i> | intercept | 1      | 14     | 203.4  | <0.0001 |
|                   |                       | ozone     | 1      | 14     | 0.17   | 0.69    |
|                   | <i>F. iberica</i>     | intercept | 1      | 7      | 109.5  | <0.0001 |
|                   |                       | ozone     | 1      | 7      | 1.75   | 0.23    |
| WUE               | <i>A. castellana</i>  | intercept | 1      | 9      | 782.18 | <0.0001 |
|                   |                       | ozone     | 1      | 9      | 5.65   | 0.04    |
|                   | <i>S. tenacissima</i> | intercept | 1      | 14     | 4114.3 | <0.0001 |
|                   |                       | ozone     | 1      | 14     | 0.49   | 0.49    |
|                   | <i>F. iberica</i>     | intercept | 1      | 7      | 256.5  | <0.0001 |
|                   |                       | ozone     | 1      | 7      | 0.75   | 0.41    |

Table S5. The structure of the random part of the model for each trait (vegetative growth, photosynthesis, conductance and WUE) and species. Line is the fumigation line of the OTC facility and nested is the O<sub>3</sub> treatment nested within line.

| Specie                | Trait             | Fixed factor   | Random factors |
|-----------------------|-------------------|----------------|----------------|
| <i>A. castellana</i>  | Vegetative growth | O <sub>3</sub> | line           |
| <i>S. tenacissima</i> | Vegetative growth | O <sub>3</sub> | line           |
| <i>F. iberica</i>     | Vegetative growth | O <sub>3</sub> | nested         |
| <i>F. indegesta</i>   | Vegetative growth | O <sub>3</sub> | nested         |
| <i>A. castellana</i>  | Vegetative growth | temperature    | line           |
| <i>S. tenacissima</i> | Vegetative growth | temperature    | line           |

|                       |                   |                |        |
|-----------------------|-------------------|----------------|--------|
| <i>F. iberica</i>     | Vegetative growth | temperature    | nested |
| <i>F. indigesta</i>   | Vegetative growth | temperature    | nested |
| <i>A. castellana</i>  | Photosynthesis    | O <sub>3</sub> | line   |
| <i>S. tenacissima</i> | Photosynthesis    | O <sub>3</sub> | line   |
| <i>F. iberica</i>     | Photosynthesis    | O <sub>3</sub> | line   |
| <i>F. indegesta</i>   | Photosynthesis    | O <sub>3</sub> | line   |
| <i>A. castellana</i>  | Photosynthesis    | temperature    | line   |
| <i>S. tenacissima</i> | Photosynthesis    | temperature    | line   |
| <i>F. iberica</i>     | Photosynthesis    | temperature    | line   |
| <i>A. castellana</i>  | Conductance       | O <sub>3</sub> | line   |
| <i>S. tenacissima</i> | Conductance       | O <sub>3</sub> | line   |
| <i>F. iberica</i>     | Conductance       | O <sub>3</sub> | line   |
| <i>F. indegesta</i>   | Conductance       | O <sub>3</sub> | line   |
| <i>A. castellana</i>  | Conductance       | temperature    | line   |
| <i>S. tenacissima</i> | Conductance       | temperature    | line   |
| <i>F. iberica</i>     | Conductance       | temperature    | line   |
| <i>A. castellana</i>  | WUE               | O <sub>3</sub> | line   |
| <i>S. tenacissima</i> | WUE               | O <sub>3</sub> | line   |
| <i>F. iberica</i>     | WUE               | O <sub>3</sub> | line   |
| <i>F. indegesta</i>   | WUE               | O <sub>3</sub> | line   |
| <i>A. castellana</i>  | WUE               | temperature    | line   |
| <i>S. tenacissima</i> | WUE               | temperature    | line   |
| <i>F. iberica</i>     | WUE               | temperature    | line   |

Table S6. PERMANOVA tables of nutrient and nutrients ratios for O<sub>3</sub> and temperature.

| Specie                | multivariable   | PERMANOVA Table  | Df | SumOfSqs | F    | P     |
|-----------------------|-----------------|------------------|----|----------|------|-------|
| <i>A. castellana</i>  | nutrients       | Ozone treatments | 3  | 0.0004   | 2.46 | 0.02  |
|                       |                 | residuals        | 19 | 0.001    |      |       |
|                       | nutrient ratios | Ozone treatments | 3  | 0.004    | 3.02 | 0.001 |
|                       |                 | residuals        | 19 | 0.008    |      |       |
|                       | nutrients       | temperature      | 1  | 0.0002   | 3.68 | 0.01  |
|                       |                 | residuals        | 9  | 0.0006   |      |       |
|                       | nutrient ratios | temperature      | 1  | 0.0004   | 5.53 | 0.01  |
|                       |                 | residuals        | 9  | 0.001    |      |       |
| <i>S. tenacissima</i> | nutrients       | Ozone treatments | 3  | 0.001    | 2.34 | 0.03  |
|                       |                 | residuals        | 19 | 0.002    |      |       |
|                       | nutrient ratios | Ozone treatments | 3  | 0.005    | 2.06 | 0.07  |
|                       |                 | residuals        | 19 | 0.02     |      |       |
|                       | nutrients       | temperature      | 1  | 0.001    | 5.15 | 0.01  |
|                       |                 | residuals        | 10 | 0.001    |      |       |
|                       | nutrient ratios | temperature      | 1  | 0.004    | 5.24 | 0.02  |
|                       |                 | residuals        | 10 | 0.008    |      |       |
| <i>F. indigesta</i>   | nutrients       | Ozone treatments | 3  | 0.003    | 0.81 | 0.64  |
|                       |                 | residuals        | 14 | 0.02     |      |       |
|                       | nutrient ratios | Ozone treatments | 3  | 0.003    | 0.7  | 0.68  |
|                       |                 | residuals        | 14 | 0.02     |      |       |
|                       | nutrients       | temperature      | 1  | 0.002    | 1.68 | 0.18  |
|                       |                 | residuals        | 9  | 0.01     |      |       |
|                       | nutrient ratios | temperature      | 1  | 0.002    | 1.57 | 0.23  |
|                       |                 | residuals        | 9  | 0.01     |      |       |
| <i>F. iberica</i>     | nutrients       | Ozone treatments | 3  | 0.001    | 1.86 | 0.048 |
|                       |                 | residuals        | 12 | 0.02     |      |       |
|                       | nutrient ratios | Ozone treatments | 3  | 0.01     | 2.8  | 0.01  |
|                       |                 | residuals        | 12 | 0.02     |      |       |
|                       | nutrients       | temperature      | 1  | 0.0003   | 2.3  | 0.12  |
|                       |                 | residuals        | 8  | 0.001    |      |       |
|                       | nutrient ratios | temperature      | 1  | 0.003    | 1.68 | 0.21  |
|                       |                 | residuals        | 8  | 0.02     |      |       |

Figure S2. Ozone and temperature observed effects on growth and gas exchange measured traits and nutrients in *A. castellana*. Upper box, effects on nutrients and nutrients rates leaf amounts: red and yellow arrows denote the effects on nutrients of ozone ( $O_3$ ) and temperature (T), respectively; pink, blue and green denote the correlation of nutrients (grey circles) and nutrient rates (white circles) with the traits; solid arrows indicate positive relationships and dashed arrows indicate negative relationships. Grey box, observed effect on traits: red and yellow arrows denote the effects on nutrients of  $O_3$  and T; straight and solid arrows indicate positive relationships and straight dashed arrows indicate negative relationships; curve solid and dashed arrows mark concave and convex trend, respectively.

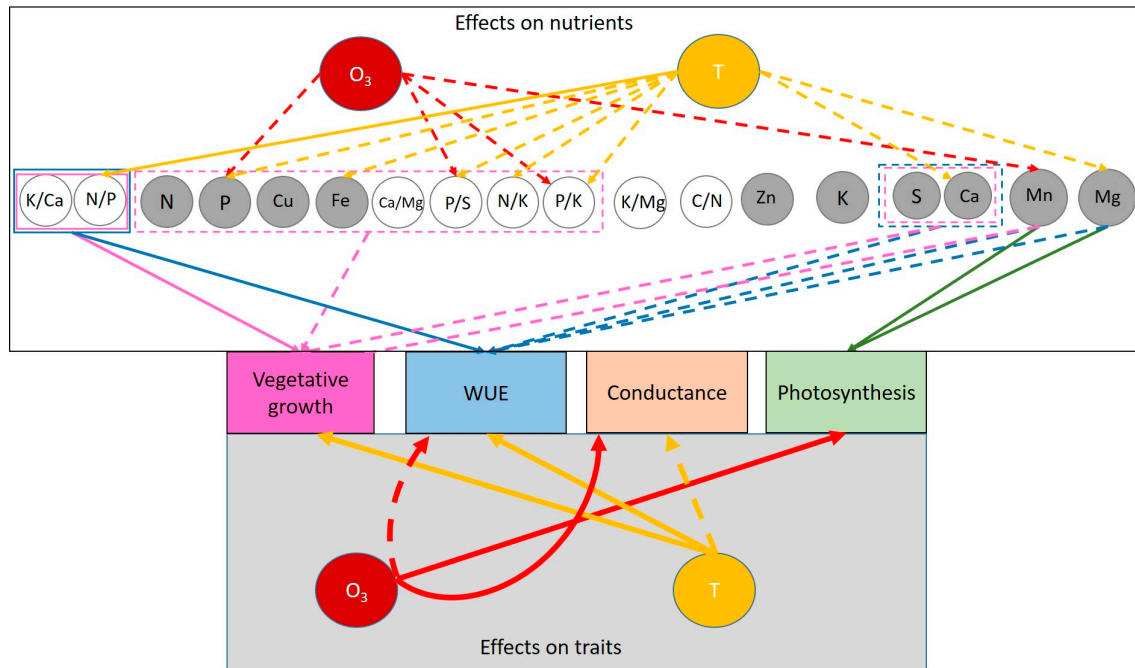



Figure S3. Ozone and temperature observed effects on growth and gas exchange measured traits and nutrients in *S. tenacissima*. Upper box, effects on nutrients and nutrients rates leaf amounts: red and yellow arrows denote the effects on nutrients of ozone ( $O_3$ ) and temperature (T), respectively; pink, blue and green denote the correlation of nutrients (grey circles) and nutrient rates (white circles) with the traits; solid arrows indicate positive relationships and dashed arrows indicate negative relationships. Grey box, observed effect on traits: red and yellow arrows denote the effects on nutrients of  $O_3$  and T; straight and solid arrows indicate positive relationships and straight dashed arrows indicate negative relationships; curve solid and dashed arrows mark concave and convex trend, respectively.

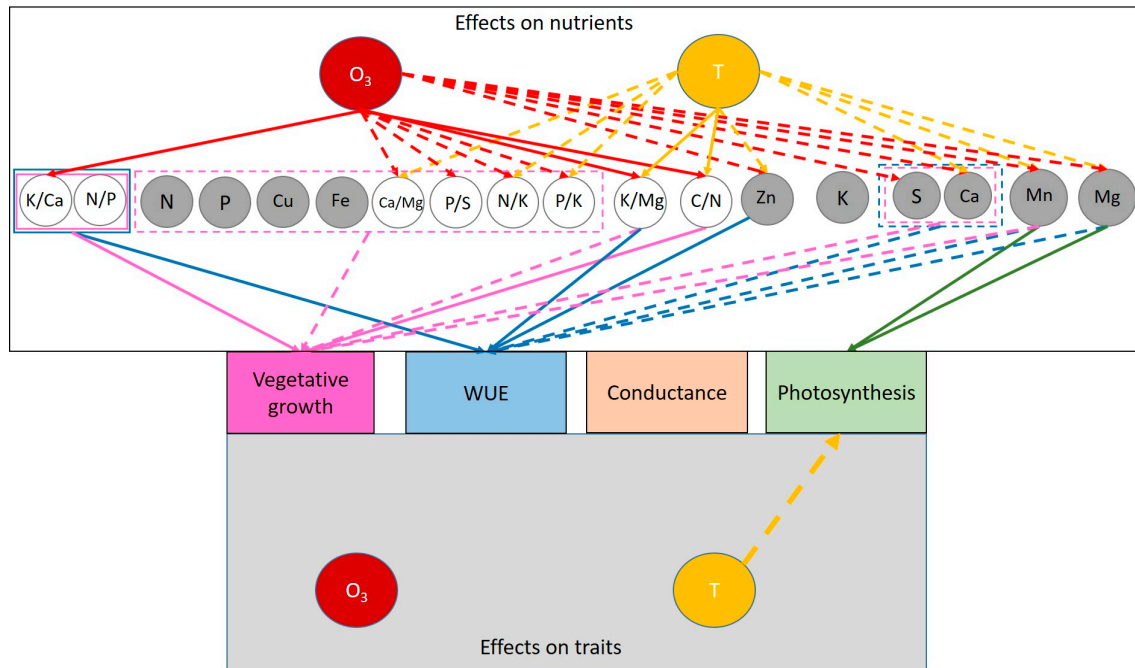

Figure S4. Ozone and temperature observed effects on growth and gas exchange measured traits and nutrients in *F. indigesta*. Upper box, effects on nutrients and nutrients rates leaf amounts. Grey box, observed effect on traits: red and yellow arrows denote the effects on nutrients of O<sub>3</sub> and T; straight and solid arrows indicate positive relationships and straight dashed arrows indicate negative relationships; curve solid and dashed arrows mark concave and convex trend, respectively.

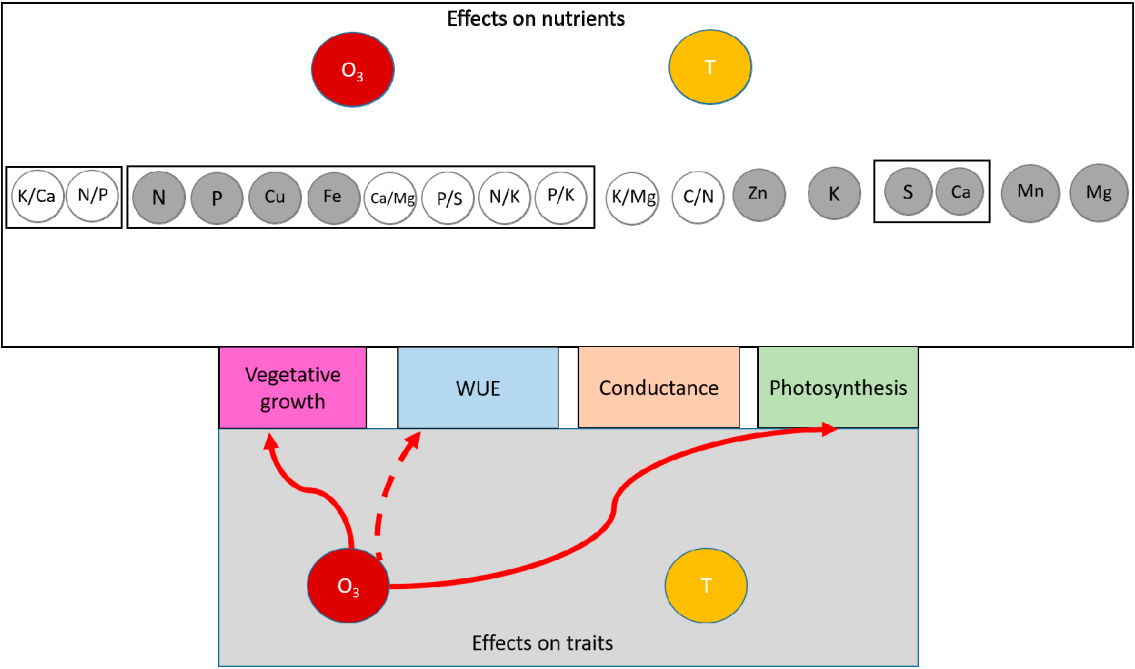

Figure S5. Ozone and temperature observed effects on growth and gas exchange measured traits and nutrients in *F. iberica*. Upper box, effects on nutrients and nutrients rates leaf amounts: red and yellow arrows denote the effects on nutrients of ozone ( $O_3$ ) and temperature (T), respectively; pink, blue and green denote the correlation of nutrients (grey circles) and nutrient rates (white circles) with the traits; solid arrows indicate positive relationships and dashed arrows indicate negative relationships. Grey box, observed effect on traits: red and yellow arrows denote the effects on nutrients of  $O_3$  and T; straight and solid arrows indicate positive relationships and straight dashed arrows indicate negative relationships; curve solid and dashed arrows mark concave and convex trend, respectively.

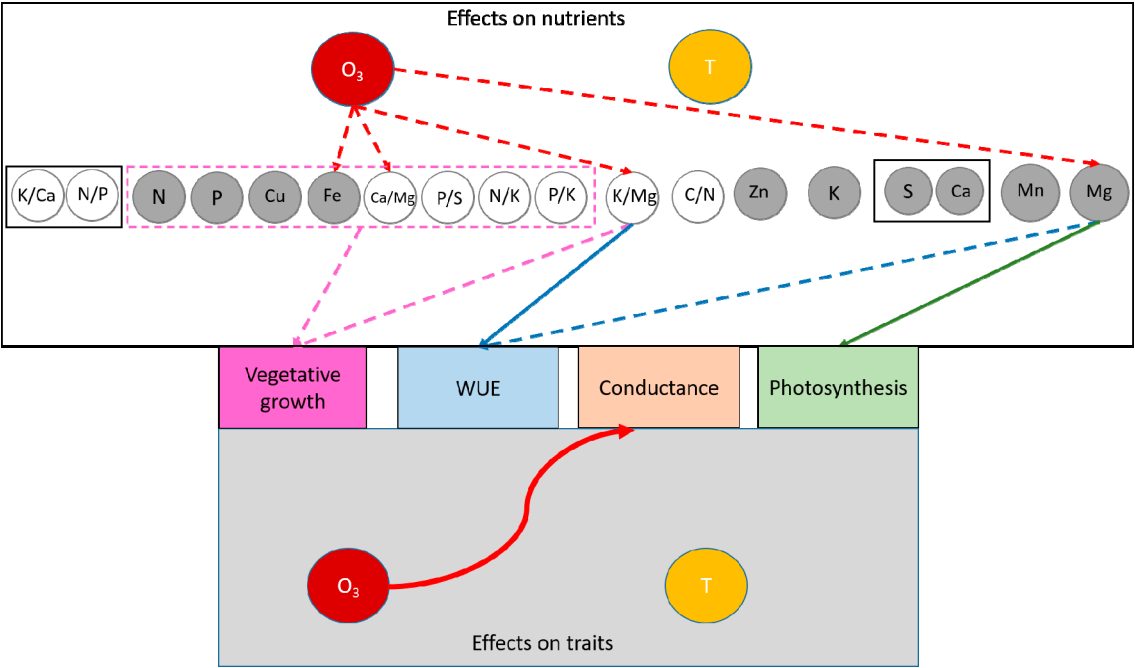

Supplement: s1 [file s1]
